# Supplementary material
Source: publisher figshare collection journal article supplement (https://frontiersin.figshare.com/ndownloader/files/23454950)
Supplement: Supplementary file [file 23454950]

**Supplementary Table S3:** T<sub>2</sub>r values in the posterior CC at different postnatal ages.

| Age (days) | C                              | MMI <sub>P0-21</sub><br>+T4 <sub>P15-21</sub> | MMI <sub>P0-21</sub>           | MMI <sub>P0</sub>        | MMI <sub>E10</sub>       |
|------------|--------------------------------|-----------------------------------------------|--------------------------------|--------------------------|--------------------------|
| P8         | 1.18 ± 0.06 <sup>a</sup>       | 1.26 ± 0.06 <sup>a</sup>                      | 1.18 ± 0.06 <sup>a</sup>       | 1.21 ± 0.06 <sup>a</sup> | 1.39 ± 0.08 <sup>a</sup> |
| P15        | 1.13 ± 0.05 <sup>a</sup>       | 1.02 ± 0.06 <sup>a</sup>                      | 1.01 ± 0.05 <sup>a</sup>       | 1.07 ± 0.05 <sup>a</sup> | 1.11 ± 0.04 <sup>a</sup> |
| P20        | 0.82 ± 0.06 <sup>a</sup>       |                                               |                                |                          |                          |
| P22        | 0.73 ± 0.06 <sup>a</sup>       | 0.96 ± 0.05 <sup>a</sup>                      | 0.98 ± 0.07 <sup>a</sup>       | 0.95 ± 0.04 <sup>a</sup> | 1.11 ± 0.04 <sup>a</sup> |
| P24        | 0.73 ± 0.03 <sup>a</sup>       |                                               |                                |                          |                          |
| P27        | 0.71 ± 0.02 <sup>a</sup>       |                                               |                                |                          |                          |
| P30        | 0.64 ± 0.02 <sup>b</sup>       | 0.83 ± 0.03 <sup>a</sup>                      | 0.79 ± 0.03 <sup>a</sup>       | 0.89 ± 0.03 <sup>a</sup> | 1.03 ± 0.04 <sup>a</sup> |
| P40        | <b>0.44 ± 0.01<sup>c</sup></b> | 0.76 ± 0.02 <sup>a</sup>                      | 0.73 ± 0.02 <sup>a</sup>       | 0.79 ± 0.02 <sup>a</sup> | 1.00 ± 0.04 <sup>a</sup> |
| P50        | <b>0.40 ± 0.02<sup>c</sup></b> | 0.62 ± 0.03 <sup>b</sup>                      | 0.70 ± 0.05 <sup>a</sup>       | 0.79 ± 0.01 <sup>a</sup> | 1.01 ± 0.02 <sup>a</sup> |
| P60        | <b>0.37 ± 0.01<sup>c</sup></b> | 0.60 ± 0.02 <sup>b</sup>                      | 0.62 ± 0.02 <sup>b</sup>       | 0.77 ± 0.02 <sup>a</sup> | 0.96 ± 0.03 <sup>a</sup> |
| P75        | <b>0.34 ± 0.02<sup>c</sup></b> | <b>0.43 ± 0.01<sup>c</sup></b>                | 0.54 ± 0.01 <sup>b</sup>       | 0.71 ± 0.04 <sup>a</sup> | 0.89 ± 0.02 <sup>a</sup> |
| P100       | <b>0.34 ± 0.02<sup>c</sup></b> | <b>0.43 ± 0.01<sup>c</sup></b>                | <b>0.45 ± 0.01<sup>c</sup></b> | 0.71 ± 0.02 <sup>a</sup> | 0.86 ± 0.03 <sup>a</sup> |
| P125       | <b>0.32 ± 0.02<sup>c</sup></b> | <b>0.43 ± 0.02<sup>c</sup></b>                | <b>0.45 ± 0.03<sup>c</sup></b> | 0.72 ± 0.01 <sup>a</sup> | 0.81 ± 0.04 <sup>a</sup> |
| P150       | <b>0.30 ± 0.01<sup>c</sup></b> | <b>0.39 ± 0.02<sup>c</sup></b>                | <b>0.45 ± 0.01<sup>c</sup></b> | 0.71 ± 0.05 <sup>a</sup> | 0.82 ± 0.03 <sup>a</sup> |
| P180       | <b>0.29 ± 0.03<sup>c</sup></b> |                                               |                                |                          | 0.78 ± 0.02 <sup>a</sup> |
| P365       | <b>0.27 ± 0.03<sup>c</sup></b> |                                               |                                |                          |                          |

Values are mean ± SD (n = 8). The anterior CC is lightly (<sup>a</sup>), similar (<sup>b</sup>) and darker (<sup>c</sup>) than the adjacent neuropil.
